# Supplementary material
Source: PubMed Central journal article supplement (PMC3808131)
Supplement: mt2013125x1.pdf [file mt2013125x1.pdf]

Supplementary Figure 1

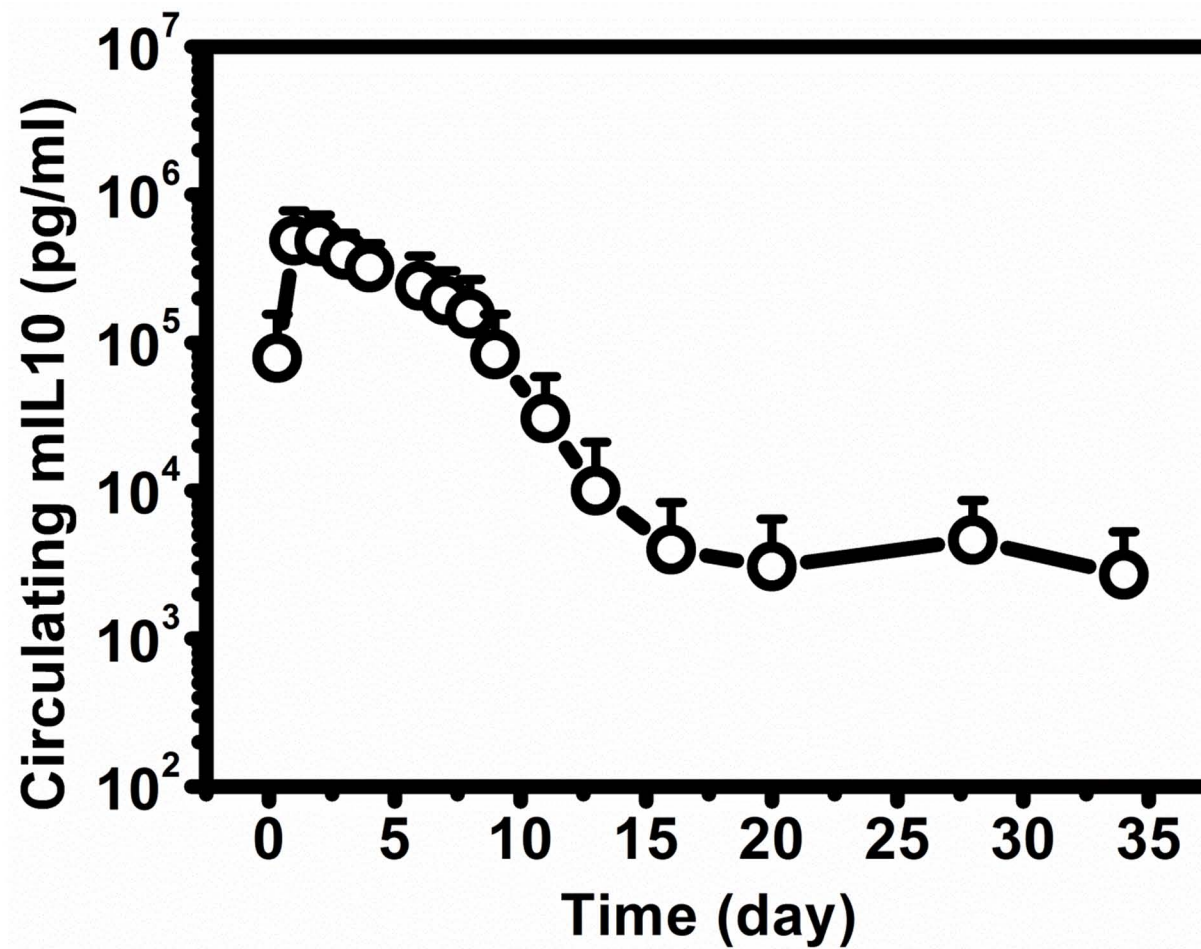

# Supplementary Figure 2

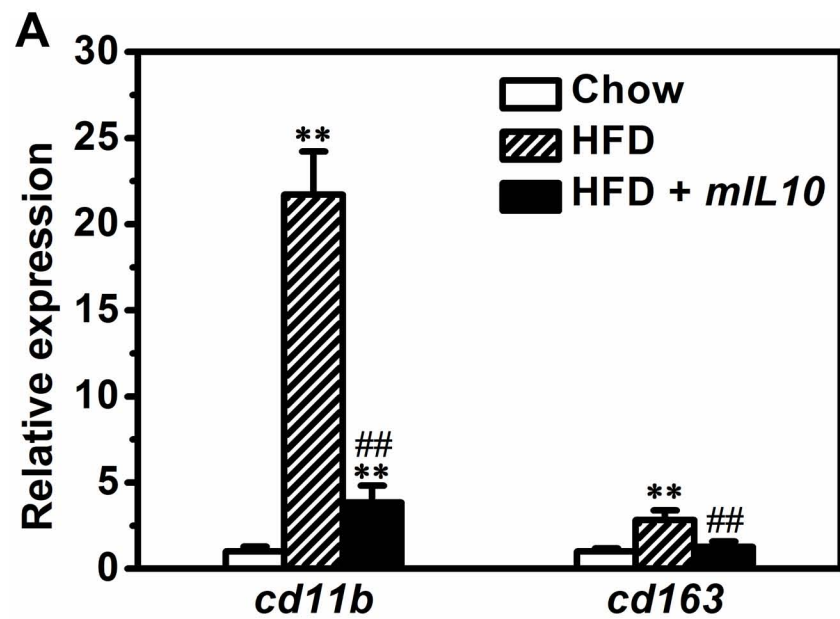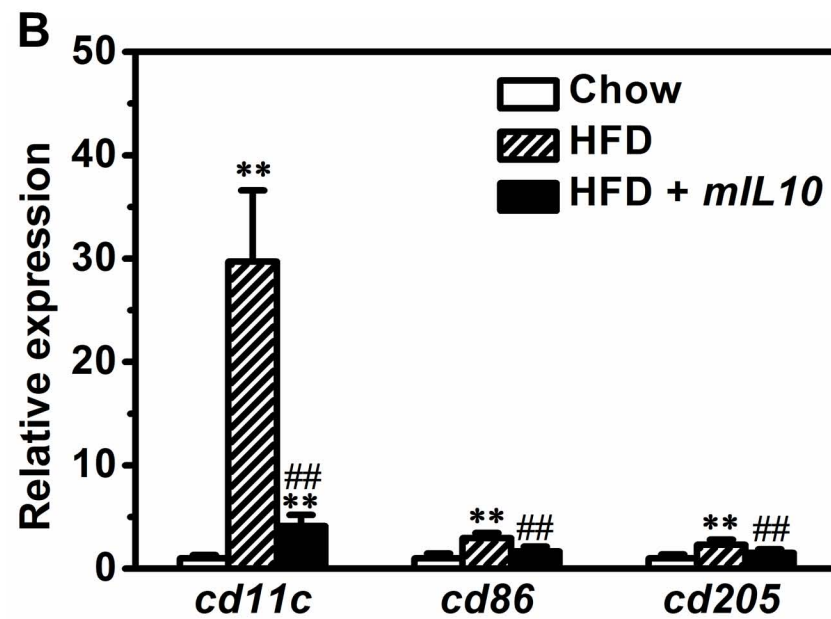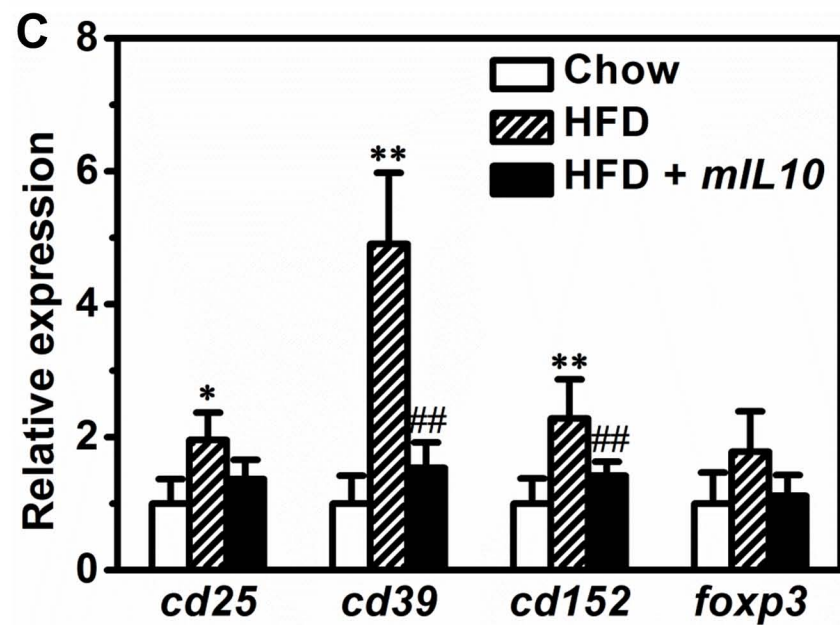

# Supplementary Figure 3

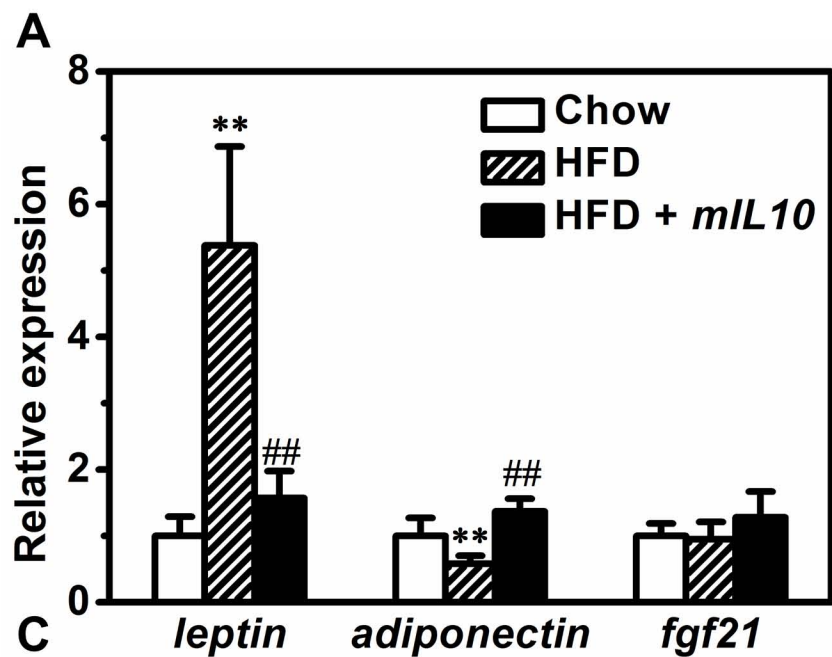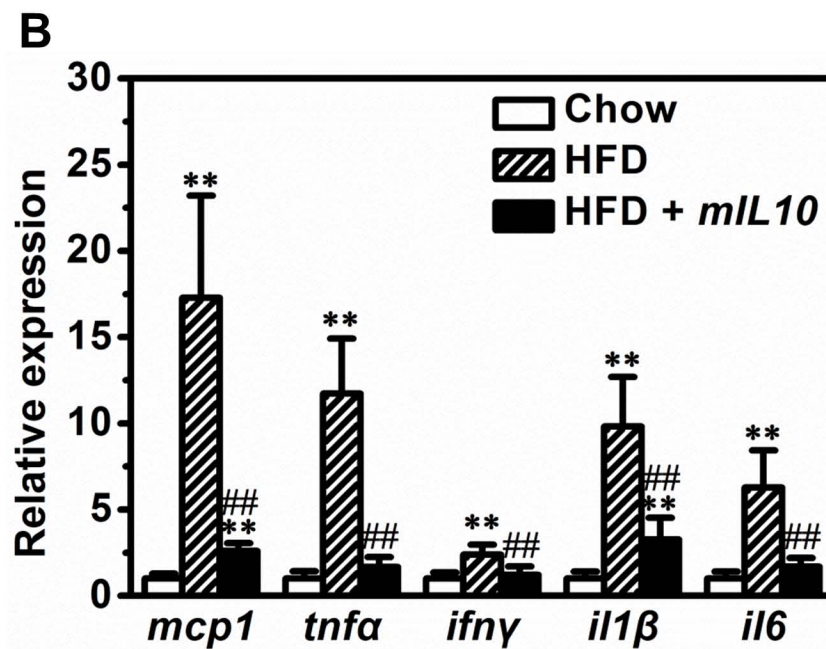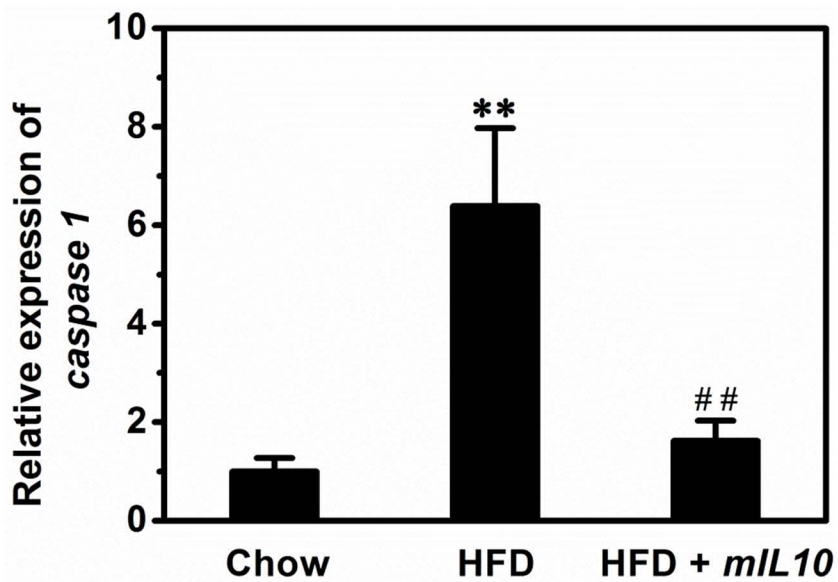

# Supplementary Figure 4

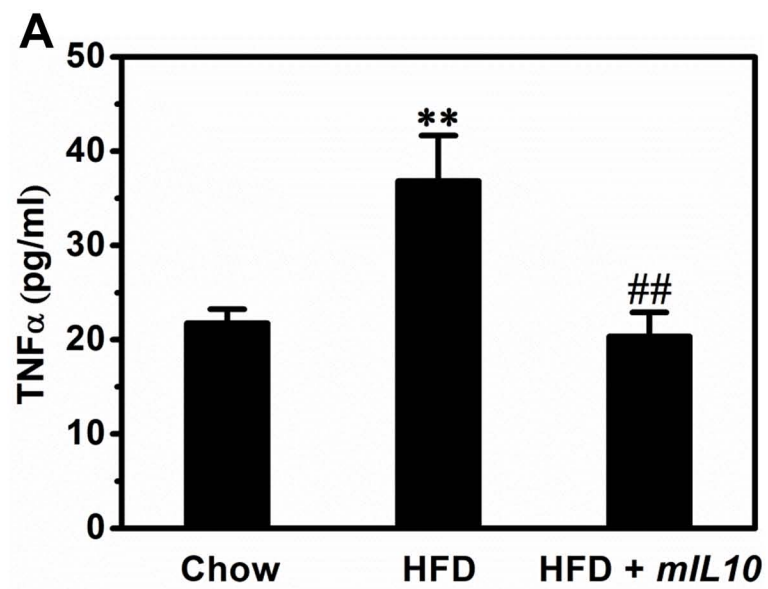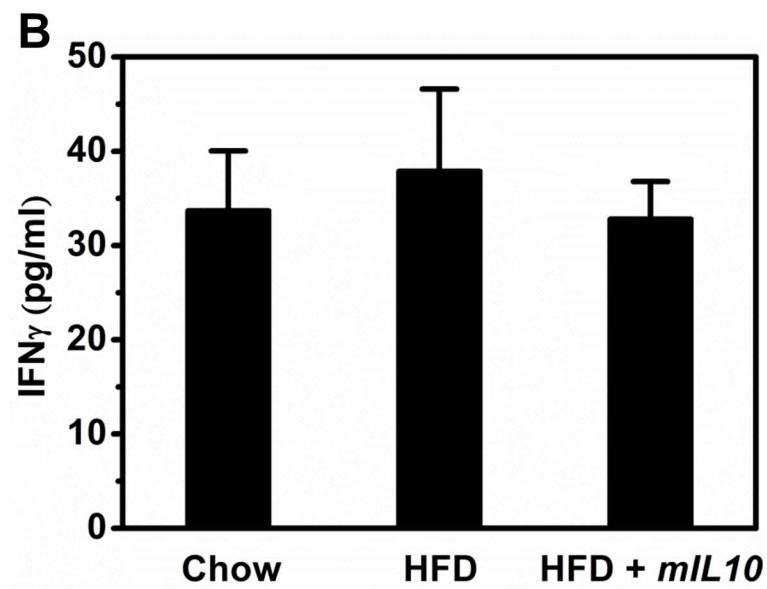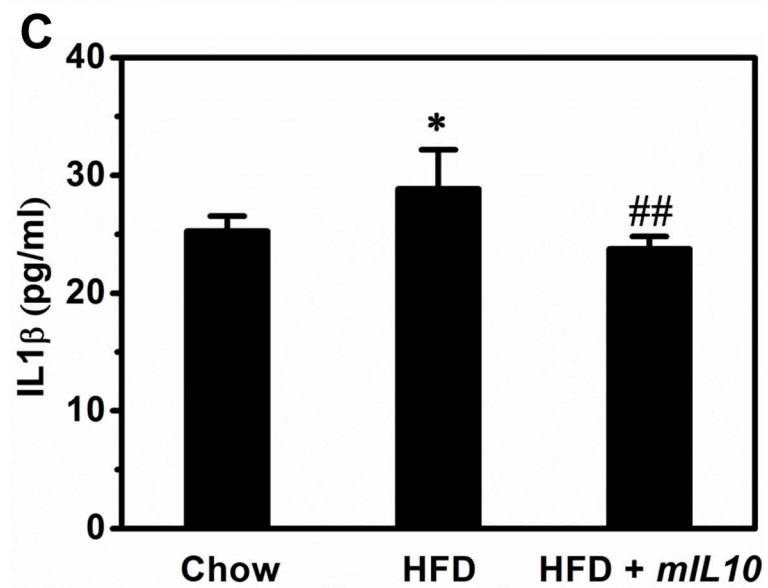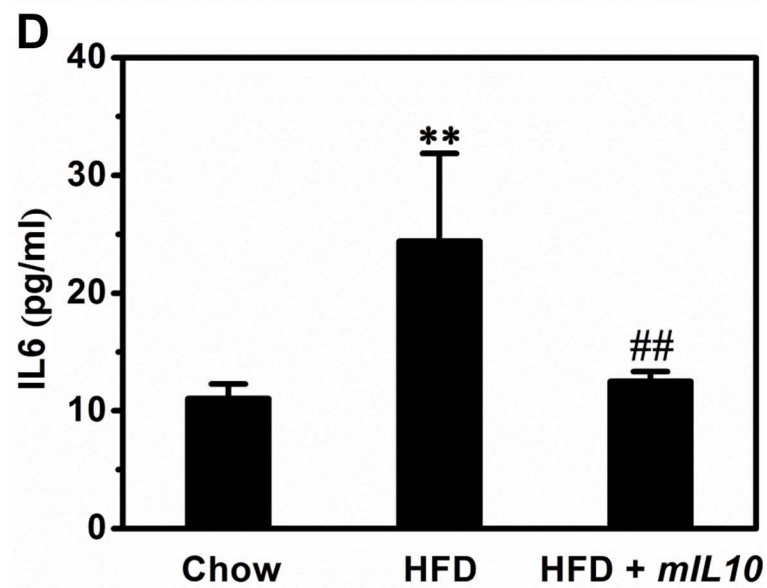

### Supplementary Table 1. PCR Primer Sequences

---

*Adiponectin*-F: TGTTCCTCTTAATCCTGCCCA

*Adiponectin*-R: CCAACCTGCACAAGTTCCCTT

*Caspase 1*-F: ACAAGGCACGGGACCTATG

*Caspase 1*-R: TCCCAGTCAGTCCTGGAAATG

*Cd11b*-F: ATGGACGCTGATGGCAATACC

*Cd11b*-R: TCCCCATTCACGTCTCCCA

*Cd11c*-F: CTGGATAGCCTTTCTTCTGCTG

*Cd11c*-R: GCACACTGTGTCCGAACTCA

*Cd25*-F: AACCATAGTACCCAGTTGTCGG

*Cd25*-R: TCCTAAGCAACGCATATAGACCA

*Cd39*-F: AAGGTGAAGAGATTTTGCTCCAA

*Cd39*-R: TTTGTTCTGGGTCAGTCCCAC

*Cd68*-F: TGTCTGATCTTGCTAGGACCG

*Cd68*-R: GAGAGTAACGGCCTTTTTGTGA

*Cd86*-F: TGTTTCCGTGGAGACGCAAG

*Cd86*-R: TTGAGCCTTTGTAAATGGGCA

*Cd152*-F: TTTTGTAGCCCTGCTCACTCT

*Cd152*-R: CTGAAGGTTGGGTCACCTGTA

*Cd163*-F: ATGGGTGGACACAGAATGGTT

*Cd163*-R: CAGGAGCGTTAGTGACAGCAG

*Cd205*-F: GCTCAGGTAATGATCCATTCACC

*Cd205*-R: TTAGTTCCGCTACAGTCCTGG

*F4/80*-F: TGACTCACCTTGTGGTCCTAA

*F4/80*-R: CTTCCCAGAATCCAGTCTTTCC

*Fgf21*-F: CTGCTGGGGGTCTACCAAG

*Fgf21*-R: CTGCGCCTACCACTGTTCC

*Foxp3*-F: CCCATCCCCAGGAGTCTTG

*Foxp3*-R: ACCATGACTAGGGGCACTGTA

*Gapdh*-F: AGGTCGGTGTGAACGGATTTG

*Gapdh*-R: TGTAGACCATGTAGTTGAGGTCA

*Glut4*-F: GTGACTGGAACACTGGTCCTA

*Glut4*-R: CCAGCCACGTTGCATTGTAG

*Ifn $\gamma$* -F: ATGAACGCTACACACTGCATC

*Ifn $\gamma$* -R: CCATCCTTTTGCCAGTTCCTC

*Il1 $\beta$* -F: GCAACTGTTCCCTGAACTCAACT

*Il1 $\beta$* -R: ATCTTTTGGGGTCCGTCAACT

*Il6*-F: TAGTCCTTCCTACCCCAATTTCC

*Il6*-R: TTGGTCCTTAGCCACTCCTTC

*IL10*-F: GCTCTTACTGACTGGCATGAG

*IL10*-R: CGCAGCTCTAGGAGCATGTG

*Leptin*-F: GAGACCCCTGTGTCGGTTC

*Leptin*-R: CTGCGTGTGTGAAATGTCATTG

*Mcp1*-F: TTAAAAACCTGGATCGGAACCAA

*Mcp1*-R:GCATTAGCTTCAGATTTACGGGT

*Tnfa*-F: CCCTCACACTCAGATCATCTTCT

*Tnfa*-R:GCTACGACGTGGGCTACAG

---
